# Supplementary material for: pH-responsive dendritic polyrotaxane drug-polymer conjugates forming nanoparticles as efficient drug delivery system for cancer therapy
Source: Royal Society of Chemistry journal article supplement (doi:10.1039/c4py01431f), 2015-01-01
Supplement: c4py01431f1.pdf [file c4py01431f1.pdf]

## Supporting Information

# pH-Responsive Dendritic Polyrotaxane drug-polymer conjugates forming nanoparticles as efficient drug delivery system for cancer therapy

Yang Kang<sup>a</sup>, Xiao-Mei Zhang<sup>a</sup>, Sheng Zhang<sup>b\*</sup>, Li-Sheng Ding<sup>a</sup> and Bang-Jing Li<sup>a\*</sup>

<sup>a</sup> Key Laboratory of Mountain Ecological Restoration and Bioresource Utilization, Chengdu Institute of Biology, Chinese Academy of Sciences, Chengdu 610041, China, Tel: +86-28-82890646. Fax: (+86)28-82890646. E-mail: libj@cib.ac.cn (B. Li);

<sup>b</sup> State Key Laboratory of Polymer Materials Engineering, Polymer Research Institute of Sichuan University, Sichuan University, Chengdu 610065, China, Tel, Fax: +86-28-85400266. E-mail: zslbj@163.com (S. Zhang).

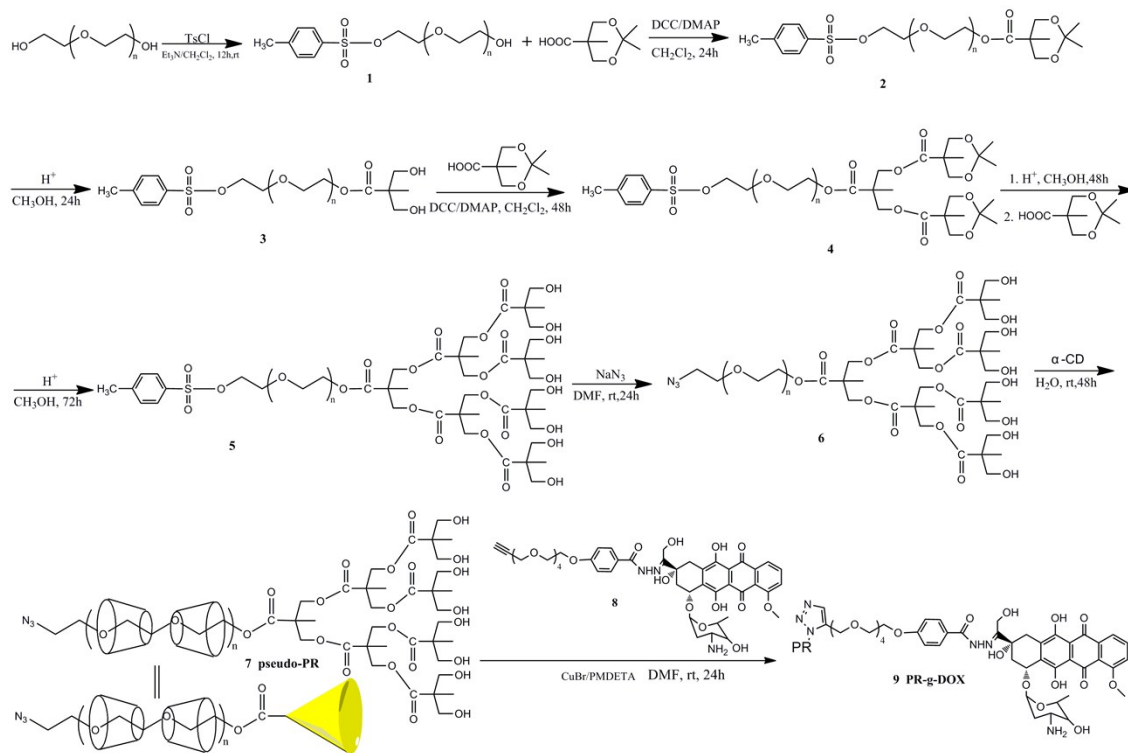

**Scheme S1** The synthesis pathway of the dendritic-polyrotaxane drug conjugate.

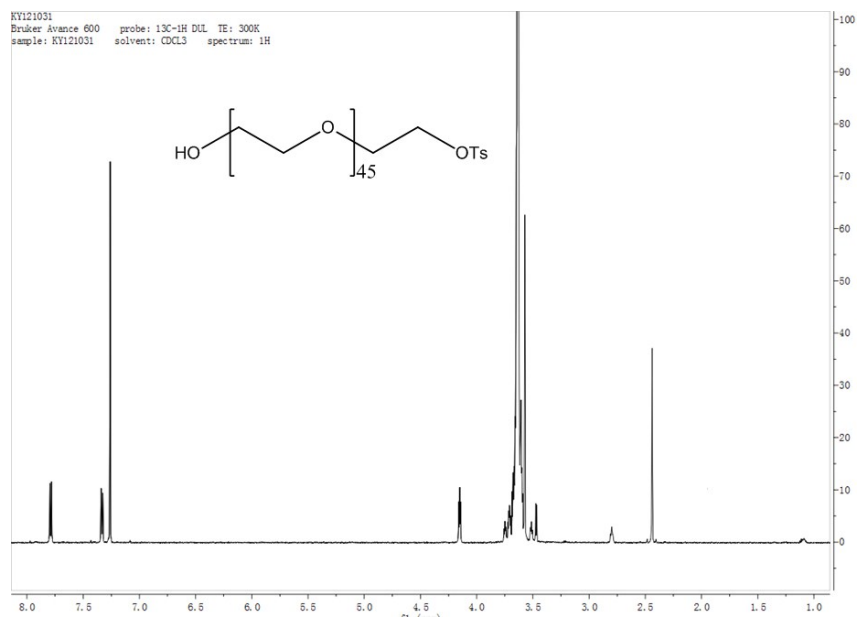

**Figure S1**  $^1\text{H}$  NMR spectrum of compound **1** (solvent:  $\text{CDCl}_3$ ).

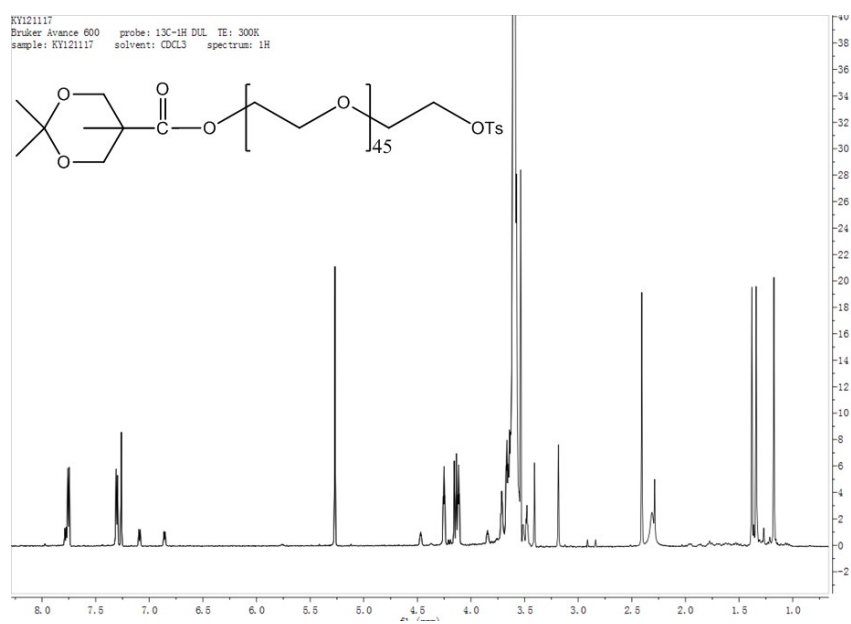

**Figure S2**  $^1\text{H}$  NMR spectrum of compound **2** (solvent:  $\text{CDCl}_3$ ).

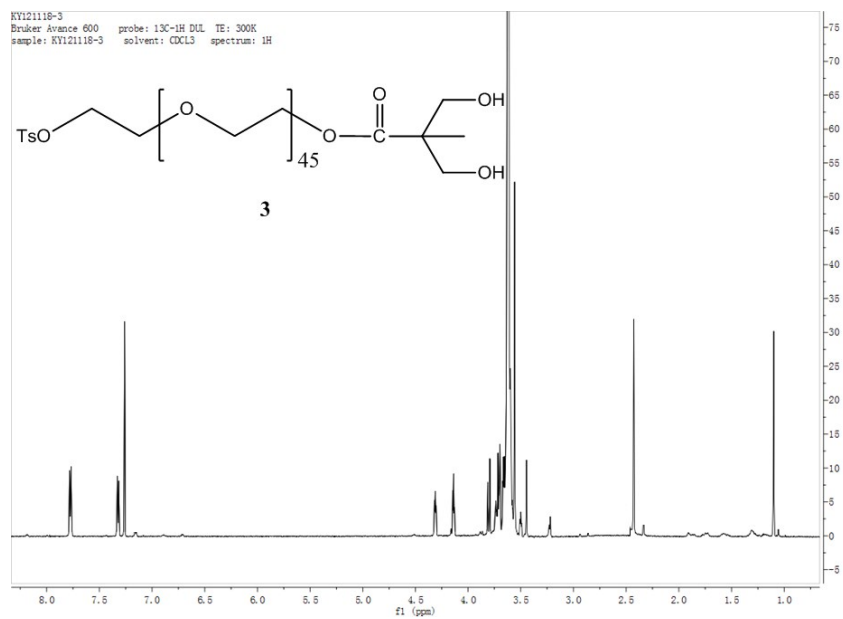

**Figure S3**  $^1\text{H}$  NMR spectrum of compound **3** (solvent:  $\text{CDCl}_3$ ).

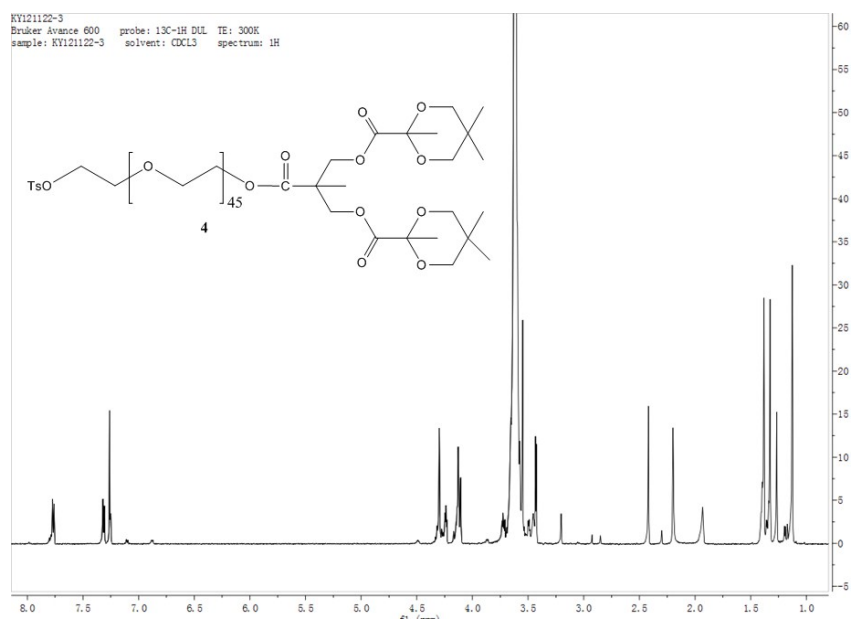

**Figure S4**  $^1\text{H}$  NMR spectrum of compound **4** (solvent:  $\text{CDCl}_3$ ).

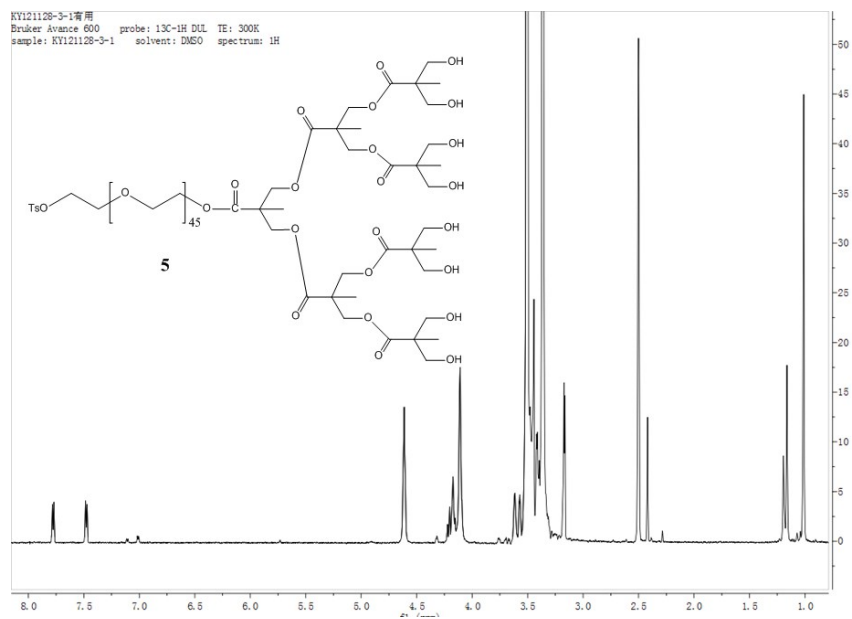

**Figure S5**  $^1\text{H}$  NMR spectrum of compound **5** (solvent:  $\text{DMSO-d}_6$ ).

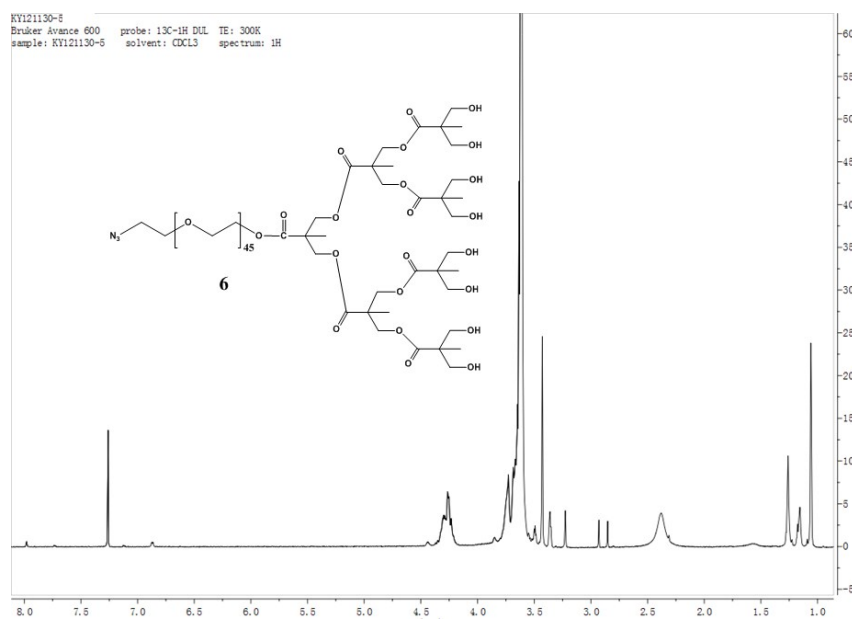

**Figure S6**  $^1\text{H}$  NMR spectrum of compound **6** (solvent:  $\text{CDCl}_3$ ).

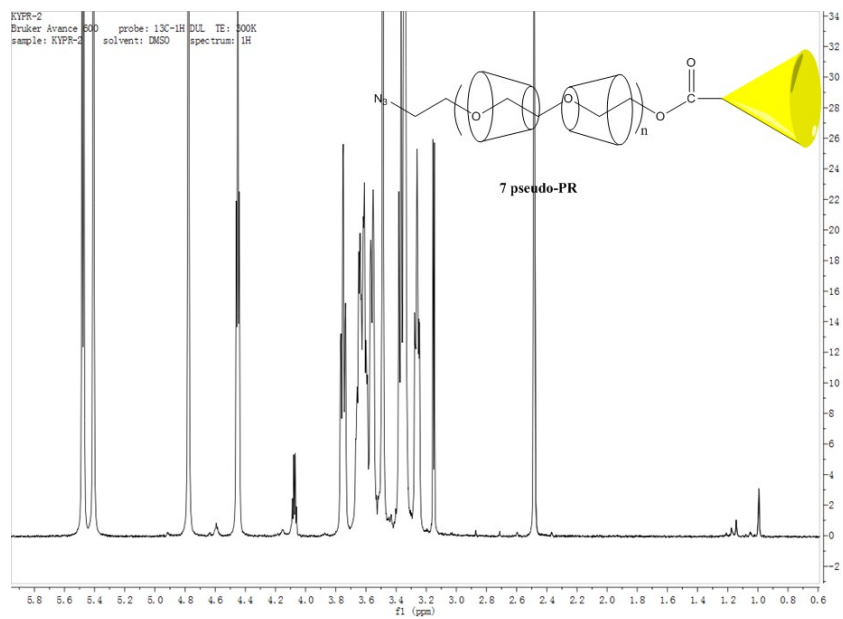

**Figure S7**  $^1\text{H}$  NMR spectrum of compound **7** (solvent:  $\text{DMSO-d}_6$ ).

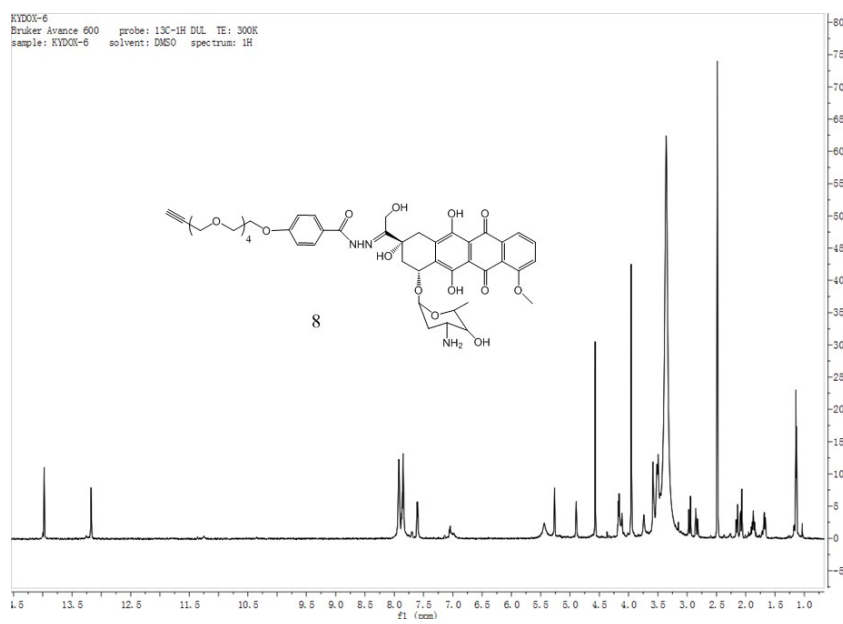

**Figure S8**  $^1\text{H}$  NMR spectrum of compound **6** (solvent:  $\text{DMSO-d}_6$ ).

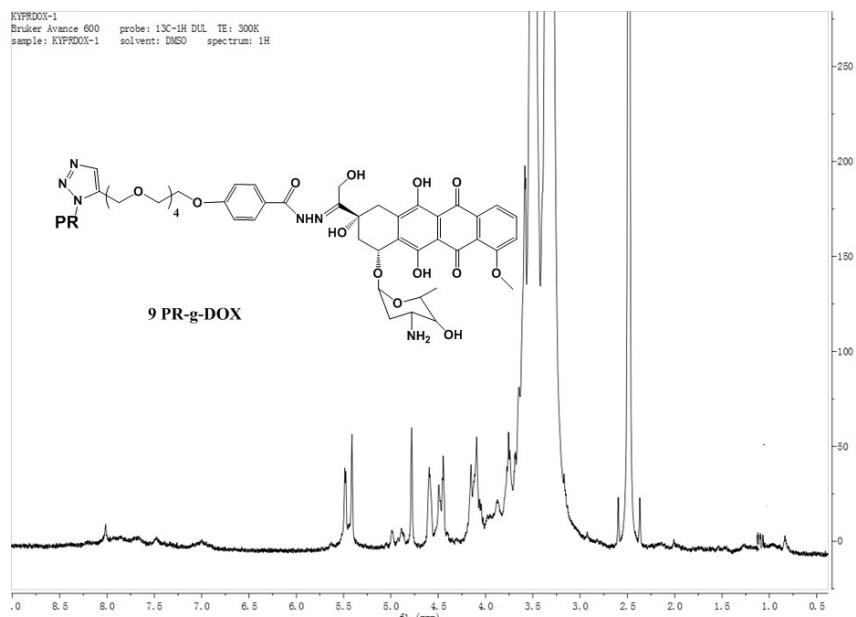

**Figure S9** <sup>1</sup>H NMR spectrum of compound **9** (solvent: DMSO-d<sub>6</sub>).

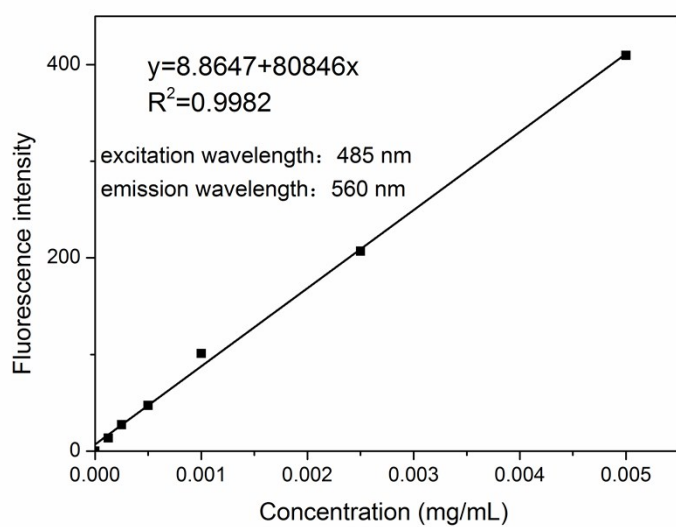

**Figure S10** Standard curve plotted by the emission at 630 nm of the standard versus the DOX concentration.

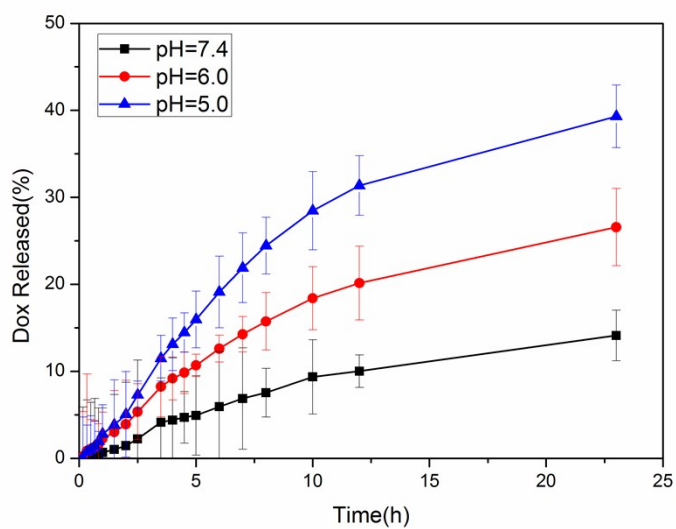

**Figure S11** pH-Triggered hydrolysis of DOX in the dendritic-polyrotaxane drug conjugate micelles in prior 24 h (n=3).
